# Supplementary material
Source: Springer Nature journal article supplement (https://www.springermedizin.de/resource/supplementary/12970_2012_365_MOESM4_ESM.pdf/9594844)

**a.**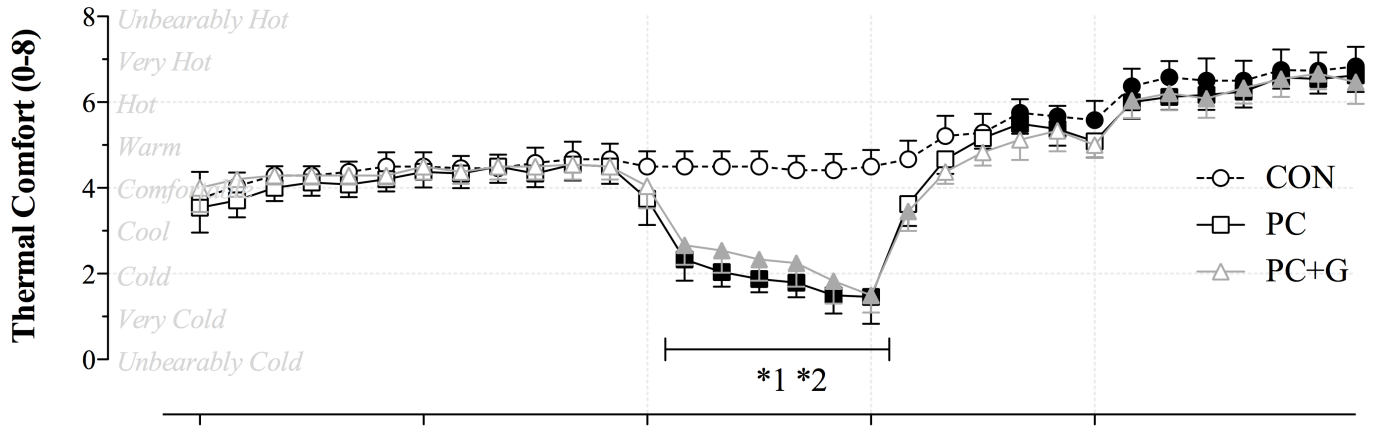**b.**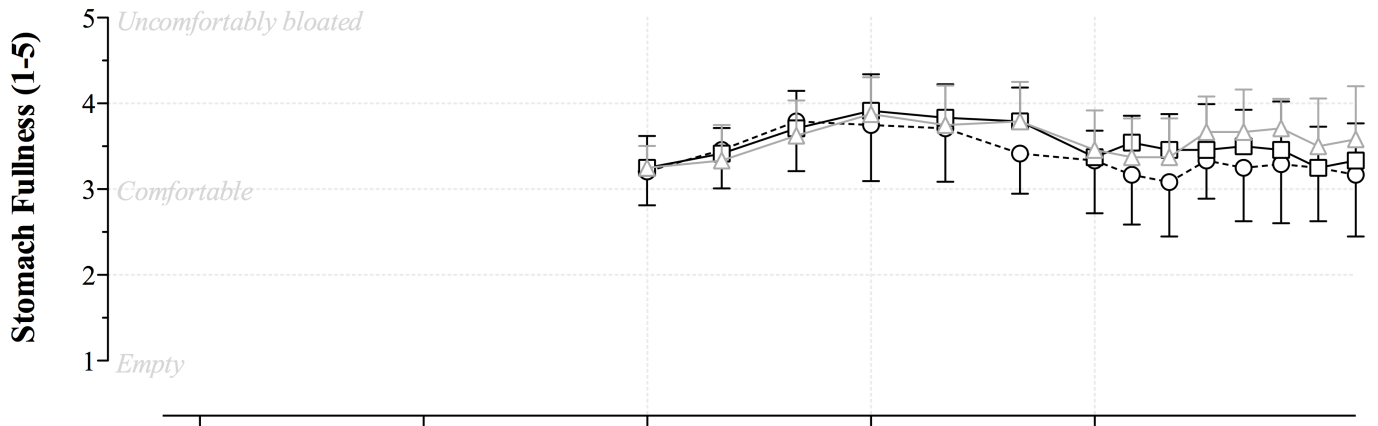**c.**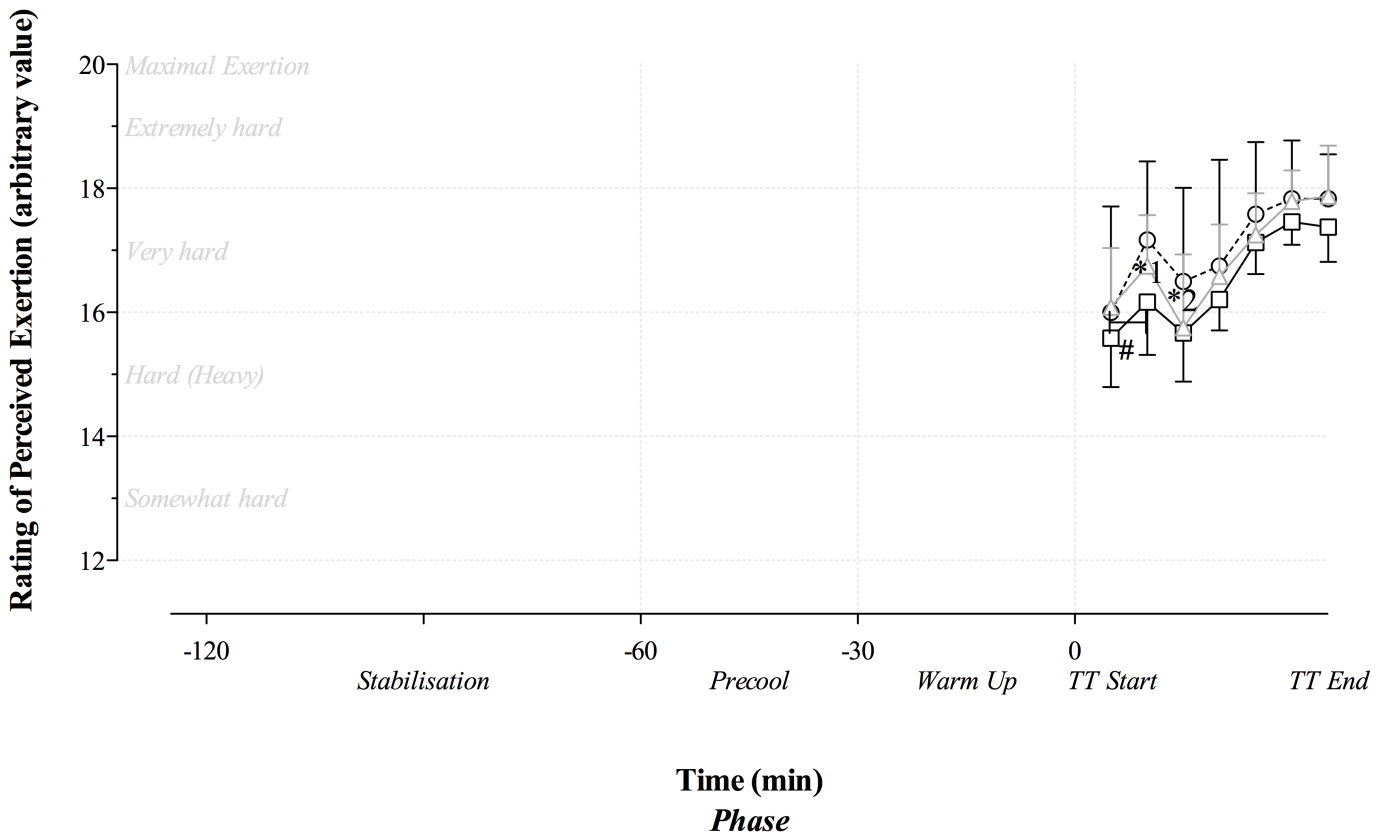

Supplement: MOESM4 [file 9594844]
